## METHOD

# A likelihood ratio test for changes in homeolog expression bias

Ronald D. Smith<sup>1</sup>, Taliesin J. Kinser<sup>2</sup>, Gregory D. Conradi Smith<sup>1</sup> and Joshua R. Puzey<sup>2\*</sup>

### Abstract

**Background:** Gene duplications are a major source of raw material for evolution and a likely contributor to the diversity of life on earth. Duplicate genes (i.e., homeologs, in the case of a whole genome duplication) may retain their ancestral function, sub- or neofunctionalize, or be lost entirely. A primary way that duplicate genes may evolve new functions is by altering their expression patterns. Comparing the expression patterns of duplicate genes may give clues as to whether any of these evolutionary processes have occurred.

**Results:** We develop a likelihood ratio test for the analysis of the expression ratios of duplicate genes across two conditions (e.g., tissues). We demonstrate an application of this test by comparing homeolog expression patterns of 1,448 homeologous gene pairs using RNA-seq data generated from the leaves and petals of an allotetraploid monkeyflower (*Mimulus luteus*). We assess the sensitivity of this test to different levels of homeolog expression bias and compare the method to several alternatives.

**Conclusions:** The likelihood ratio test derived here is a direct, transparent, and easily implemented method for detecting changes in homeolog expression bias that outperforms three alternative approaches. While our method was derived with homeolog analysis in mind, this method can be used to analyze changes in the ratio of expression levels between any two genes in any two conditions.

**Keywords:** homeolog expression bias; likelihood ratio test; polyploid; RNA-seq; whole genome duplication

## Background

Gene duplications are a major source of raw material for evolution and a likely contributor to the diversity of life on earth [1–9]. Gene duplications are a special type of mutation resulting in the multiplication of intact functional components. These duplicate genes may either retain the ancestral function or individual portions of the gene's ancestral function may be partitioned (i.e., subfunctionalize) or evolve new functions entirely (i.e., neofunctionalize) [10–12]. Duplicate genes may evolve new functions either by changes in the primary coding sequence or altering where and when they are expressed. Previous work has indicated that changes to gene expression and their regulatory networks may be more important, rapid, or flexible than divergence of protein identities in the evolution of sub- and neofunctionalization [13–19].

There are multiple scenarios in which genes can be duplicated, ranging from small regional gene duplications to massive whole genome duplications (WGDs).

The term polyploid refers to cells or organisms that have undergone a WGD event and contain more than two paired sets of chromosomes. Each complete set of chromosomes is referred to as a subgenome. Homologous genes located on separate subgenomes are referred to as homeologs.

WGDs are especially common in plants; indeed, all extant angiosperms (i.e., flowering plants) have at least two rounds of WGD in common [20] and up to 15% of speciation events in angiosperms may have been the product of WGDs [21]. Importantly, all major crops (rice, corn, potato, wheat, etc.) are polyploid [22]. WGD events and the resulting polyploidy are not restricted to plants, but have occurred in both vertebrate and invertebrate lineages as well. For example, the African clawed frog, *Xenopus*, commonly used as an experimental model system and extensively studied in developmental biology, includes species ranging from diploid to dodecaploid [23]. Other examples of polyploids with ancient WGD events include the zebrafish *Danio rerio* [24], several salmonids [2], and some species of fungi [25]. Interestingly, there exists at least one polyploid mammal [26], a tetraploid rat from

\*Correspondence: [jrpuzey@wm.edu](mailto:jrpuzey@wm.edu)

<sup>2</sup>Department of Biology, The College of William & Mary, 23187, Williamsburg, VA, USA

Full list of author information is available at the end of the article

Argentina that mediates gene dosage by regulation of ribosomal RNA.

The biological consequences of gene duplications and subfunctionalization are significant and include examples such as the evolution of eyes [27], the evolution of hemoglobins [28], development of heat resistance in plants [29], and insecticide resistance [30]. Given the importance of duplicate genes in evolution, it is natural to ask how we might quantify differences in the activity or function of homeologous genes. One way to begin exploring this question is by analyzing gene expression levels.

Genome-wide gene expression levels are commonly quantified using high throughput RNA sequencing (RNA-seq) [31]. In RNA-seq experiments, mRNA is extracted, purified, and reverse transcribed into cDNA. This cDNA is fragmented into smaller pieces and sequenced using next-generation technology. The resulting millions of sequence reads are then mapped to either a reference genome or reference transcriptome, and the number of sequences mapping to a particular gene is used as an indication of the expression level of that gene.

In *differential expression analysis*, high-throughput RNA-seq data is used to determine if gene expression levels vary under different experimental conditions, or in distinct tissues, etc. Several different approaches to this statistical analysis exist [32–34], some of which use methods based on maximum likelihood estimation and likelihood ratio tests.

Homeologous gene pairs frequently have distinguishing sequence differences. Therefore, sequencing reads derived from individual homeologs can be distinguished and expression levels can be determined for each homeolog. The term *homeolog expression bias* (HEB) refers to cases where homeologs are expressed at unequal levels in a single experimental condition [35]. The primary objective of this paper, development of a likelihood ratio test for statistical analysis of *changes* in homeolog expression bias (denoted  $\Delta\text{HEB}$ ) is a non-trivial extension of the statistical analysis of differential expression.

The following sections begin with the derivation of a likelihood ratio test for HEB. This is our starting point for the development of a likelihood ratio test for  $\Delta\text{HEB}$ , i.e. changes in relative expression levels between homeologous genes in two conditions. We demonstrate an application of this method using RNA-seq data to compare homeologous gene expression in petals and leaves of the allotetraploid *Mimulus luteus*. Finally, using simulated data, we show that the likelihood ratio test for  $\Delta\text{HEB}$  derived here is the best choice among competing methods.

## Methods

### Quantifying homeolog expression bias (HEB)

We will write  $A$  and  $B$  to denote a homeologous gene pair from which RNA-seq data is generated in  $n$  biological replicates. Typically, the mean expression levels of the homeologs (denoted  $\bar{a}$  and  $\bar{b}$ ) are normalized by gene length and sequencing depth, as when reported in units of RPKM (reads per kilobase of coding sequence per million mapped reads). We define the homeolog expression bias (HEB) of the  $n$  replicates as

$$\text{HEB} = \log(\bar{b}/\bar{a}) = \log \bar{b} - \log \bar{a},$$

a dimensionless quantity with  $\text{HEB} = 0$  indicating no bias. If one uses the base 2 logarithm,  $\text{HEB} = -3$  indicates 8-fold bias towards homeolog  $A$ .

### Likelihood ratio test for HEB

After accounting for the possibility of different gene lengths, the statistical test for HEB is essentially a likelihood ratio test for differential expression of a pair of homeologous genes. The goal is to determine whether there is sufficient evidence to reject the null hypothesis ( $H_0$ ) that there is no bias (i.e., equal expression levels for homeologous genes) in favor of the alternative hypothesis ( $H_1$ ) that bias is present, i.e., different expression levels for homeologous genes. In mathematical terms, the null hypothesis  $H_0$  corresponds to the parameters (denoted by  $\theta$ ) of a probability model for generating the data being in a specified subset  $\Theta_0$  of the parameter space  $\Theta$ , that is,

$$\begin{aligned} H_0: \theta &\in \Theta_0 \\ H_1: \theta &\in \Theta \setminus \Theta_0. \end{aligned}$$

Let  $\theta = (\lambda^a, \lambda^b)$  denote the true but unknown expression levels (properly scaled, e.g., in units of RPKM). Assuming positive, i.e. non-zero, expression, the parameter space is  $\Theta = \{\theta : \lambda^a, \lambda^b \in \mathbb{R}_+\}$ . The null ( $H_0$ ) and alternative ( $H_1$ ) hypotheses for the likelihood ratio test for homeolog expression bias are formalized as follows,

$$\begin{aligned} H_0: (\lambda^a, \lambda^b) &\in \{\lambda^a, \lambda^b \in \mathbb{R}_+ : \lambda^a = \lambda^b\} \\ H_1: (\lambda^a, \lambda^b) &\in \{\lambda^a, \lambda^b \in \mathbb{R}_+ : \lambda^a \neq \lambda^b\}. \end{aligned}$$

Equivalently, let  $\omega = \lambda^b/\lambda^a$  denote the ratio of expression levels and drop the superscript indicating the reference homeolog ( $\lambda = \lambda^a$ ). In that case,  $\lambda^b = \omega\lambda$  and the hypotheses are written as follows,

$$\begin{aligned} H_0: (\lambda, \omega) &\in \{\lambda, \omega \in \mathbb{R}_+ : \omega = 1\} \\ H_1: (\lambda, \omega) &\in \{\lambda, \omega \in \mathbb{R}_+ : \omega \neq 1\}. \end{aligned}$$

Once we specify a probability model for the data  $\mathcal{X}$ , likelihood functions for each hypothesis,  $\mathcal{L}_0(\theta|\mathcal{X})$  and  $\mathcal{L}_1(\theta|\mathcal{X})$ , can be derived (see next section). For composite hypotheses, the appropriate likelihood ratio test statistic is

$$W(\mathcal{X}) = -2 \ln \frac{\hat{\mathcal{L}}_0}{\hat{\mathcal{L}}_1} = 2 \left( \ln \hat{\mathcal{L}}_1 - \ln \hat{\mathcal{L}}_0 \right), \quad (1)$$

where  $\hat{\mathcal{L}}_1$  and  $\hat{\mathcal{L}}_0$  are the maximized likelihoods,

$$\begin{aligned} \hat{\mathcal{L}}_1 &= \sup\{\mathcal{L}(\theta|\mathcal{X}) : \theta \in \Theta\} \\ \hat{\mathcal{L}}_0 &= \sup\{\mathcal{L}(\theta|\mathcal{X}) : \theta \in \Theta_0\}. \end{aligned}$$

A critical value of the test statistic ( $W_*$ ) is obtained from the Chi-squared distribution with significance level  $\alpha = 0.05$ . The number of degrees of freedom  $\delta$  is the difference in the number of free parameters in  $\Theta$  and  $\Theta_0$  (here  $\delta = 1$ ) [36]. The null hypothesis  $H_0$  is rejected in favor of the alternative  $H_1$  when  $W(\mathcal{X}) > W_*$ .

#### Probability model for RNA-seq read counts

Denote the lengths of homeologous genes  $a$  and  $b$  as  $\ell^a$  and  $\ell^b$  (e.g., in kilobases) and let  $d_i$  be the sequencing depth (e.g., in millions of mapped reads) of replicate  $i$ . The expected number of RNA-seq reads for gene  $a$  and replicate  $i$  is

$$\mu_i^a = \lambda^a \ell^a d_i = \lambda \ell^a d_i, \quad (2)$$

where in the second equality we have dropped the superscript for the reference homeolog ( $\lambda = \lambda^a$ ). Similarly, the expected number of RNA-seq reads for gene  $b$  and replicate  $i$  is

$$\mu_i^b = \lambda^b \ell^b d_i = \omega \lambda \ell^b d_i \quad (3)$$

where  $\omega = \lambda^b / \lambda^a = \lambda^b / \lambda$ .

The probability model assumes that the count data for each gene is drawn from a negative binomial distribution,

$$f(x; \mu, r) = \frac{\Gamma(r+x)}{\Gamma(r)x!} \left( \frac{\mu}{\mu+r} \right)^x \left( \frac{r}{\mu+r} \right)^r,$$

where  $\mu$  is the appropriate mean ( $\mu_i^a$  or  $\mu_i^b$  in Eqs. 2 and 3). That is, if  $X_i^a$  and  $X_i^b$  are random variables representing the count data for replicate  $i$  of homeologous genes A and B,

$$\begin{aligned} \Pr\{X_i^a = a_i\} &= f(a_i; \lambda \ell^a d_i, r_i) \\ \Pr\{X_i^b = b_i\} &= f(b_i; \omega \lambda \ell^b d_i, r_i), \end{aligned}$$

where we have used  $\mu_i^a = \lambda \ell^a d_i$  and  $\mu_i^b = \omega \lambda \ell^b d_i$ . In these expressions, the aggregation parameter  $r_i$  is obtained from the observed mean-variance relation for all homeolog pairs of the  $i$ th experimental replicate (see Appendix 1).

Assuming independence of experimental replicates, the likelihood functions  $\mathcal{L}_1$  and  $\mathcal{L}_0$  are products of the likelihood functions for each observation, that is,

$$\mathcal{L}_1(\mathcal{X}) = \prod_{i=1}^n \mathcal{L}_1^i(\mathcal{X}),$$

and similarly for  $\mathcal{L}_0(\mathcal{X})$ , where  $\mathcal{X}_i = \{a_i, b_i\}$  indicates the observed read counts for replicate  $i$  and  $\mathcal{X} = \cup_{i=1}^n \mathcal{X}_i$ . The likelihood function for the alternative hypothesis and the  $i$ th replicate is

$$\begin{aligned} \mathcal{L}_1^i(\mathcal{X}) &= \frac{\Gamma(r_i + a_i)}{\Gamma(r_i) a_i!} \frac{\Gamma(r_i + b_i)}{\Gamma(r_i) b_i!} \\ &\times \left( \frac{\lambda \ell^a d_i}{\lambda \ell^a d_i + r_i} \right)^{a_i} \left( \frac{\omega \lambda \ell^b d_i}{\omega \lambda \ell^b d_i + r_i} \right)^{b_i} \\ &\times \left( \frac{r_i}{\lambda \ell^a d_i + r_i} \right)^{r_i} \left( \frac{r_i}{\omega \lambda \ell^b d_i + r_i} \right)^{r_i}. \end{aligned} \quad (4)$$

The likelihood function for the null hypothesis and the  $i$ th replicate,  $\mathcal{L}_0^i(\mathcal{X})$ , is given by Eq. 4 with  $\omega = 1$ .

#### Maximum likelihood estimation

Maximum likelihood estimation is performed using the the log-likelihood function corresponding to Eq. 4, namely,

$$\ln \mathcal{L}_1(\mathcal{X}) = \sum_i \ln \mathcal{L}_1^i(\mathcal{X}), \quad (5)$$

where

$$\begin{aligned} \ln \mathcal{L}_1^i(\mathcal{X}) &= \gamma(r_i + a_i) + \ln(a_i!) \\ &+ \gamma(r_i + b_i) + \ln(b_i!) \\ &+ 2r_i \ln r_i - 2\gamma(r_i) \\ &+ a_i \ln(\lambda \ell^a d_i) + b_i \ln(\omega \lambda \ell^b d_i) \\ &- (a_i + r_i) \ln(\lambda \ell^a d_i + r_i) \\ &- (b_i + r_i) \ln(\omega \lambda \ell^b d_i + r_i) \end{aligned} \quad (6)$$

and  $\gamma(\cdot) = \ln \Gamma(\cdot)$ . The log-likelihood function for the null hypothesis ( $\ln \mathcal{L}_0$ ) is given by Eq. 13 with  $\omega = 1$ .

The log-likelihood function  $\ln \mathcal{L}_1(\mathcal{X})$  is maximized by numerically solving for  $\hat{\lambda}$  and  $\hat{\omega}$  leading to zero partial derivatives,

$$0 = \left. \frac{\partial \ln \mathcal{L}_1}{\partial \lambda} \right|_{\hat{\lambda}, \hat{\omega}} \quad (7)$$

$$0 = \left. \frac{\partial \ln \mathcal{L}_1}{\partial \omega} \right|_{\hat{\lambda}, \hat{\omega}}, \quad (8)$$

as described in Appendix 2. The log-likelihood function  $\ln \mathcal{L}_0(\mathcal{X})$  is maximized by solving for  $\hat{\lambda}$  leading to

$$0 = \left. \frac{\partial \ln \mathcal{L}_0}{\partial \lambda} \right|_{\hat{\lambda}}. \quad (9)$$

The optimal parameter values  $\hat{\lambda}$  and  $\hat{\omega}$  are used to evaluate  $\ln \hat{\mathcal{L}}_0(\mathcal{X}; \hat{\lambda})$ ,  $\ln \hat{\mathcal{L}}_1(\mathcal{X}; \hat{\lambda}, \hat{\omega})$ , and the test statistic  $W$  (see Eq. 1).

### Quantifying changes in homeolog expression bias ( $\Delta$ HEB)

Let  $A$  and  $B$  represent homeologous genes and RNA-seq data is generated under conditions 1 and 2 in  $n$  biological replicates, leading to mean expression levels  $\bar{a}_1, \bar{a}_2, \bar{b}_1, \bar{b}_2$ . The change in homeolog expression bias ( $\Delta$ HEB) is defined as

$$\Delta\text{HEB} = \text{HEB}_2 - \text{HEB}_1 = \log \left( \frac{\bar{b}_2/\bar{a}_2}{\bar{b}_1/\bar{a}_1} \right), \quad (10)$$

where the last equality uses  $\text{HEB}_1 = \log \bar{b}_1/\bar{a}_1$  and  $\text{HEB}_2 = \log \bar{b}_2/\bar{a}_2$ .

### Likelihood ratio test for $\Delta$ HEB

The likelihood ratio test for  $\Delta$ HEB is designed to determine whether there is sufficient evidence to reject the null hypothesis ( $H_0$ ) that homeolog expression bias is the same under two experimental conditions ( $\Delta\text{HEB} = 0$ ) in favor of the alternative hypothesis ( $H_1$ ) that there is a difference in bias ( $\Delta\text{HEB} \neq 0$ ). Following notation similar to the previous section, our hypotheses are

$$\begin{aligned} H_0: \theta \in \Theta_0 &= \{\lambda_{1|2}^{a|b} \in \mathbb{R}_+ : \lambda_1^b/\lambda_1^a = \lambda_2^b/\lambda_2^a\} \\ H_1: \theta \in \Theta \setminus \Theta_0 &= \{\lambda_{1|2}^{a|b} \in \mathbb{R}_+ : \lambda_1^b/\lambda_1^a \neq \lambda_2^b/\lambda_2^a\}, \end{aligned}$$

where  $\lambda_{1|2}^{a|b}$  is an abbreviation for  $\lambda_1^a, \lambda_1^b, \lambda_2^a, \lambda_2^b$ . Equivalently,

$$\begin{aligned} H_0: \theta \in \Theta_0 &= \{\lambda_{1|2}, \omega_{1|2} \in \mathbb{R}_+ : \omega_1 = \omega_2\} \\ H_1: \theta \in \Theta \setminus \Theta_0 &= \{\lambda_{1|2}, \omega_{1|2} \in \mathbb{R}_+ : \omega_1 \neq \omega_2\}, \end{aligned}$$

where  $\omega_1 = \lambda_1^b/\lambda_1^a$ ,  $\omega_2 = \lambda_2^b/\lambda_2^a$ ,  $\lambda_1 = \lambda_1^a$  and  $\lambda_2 = \lambda_2^a$ . The difference in degrees of freedom of the alternative and null hypotheses is  $\delta = 4 - 3 = 1$ .

The likelihood functions for the  $\Delta$ HEB test are similar to those for HEB, though the two different experimental conditions lead to twice as many terms (cf. Eq. 4). The likelihood function for  $H_1$  is

$$\mathcal{L}_1(\mathcal{X}) = \prod_{k=1}^2 \prod_{i=1}^n \mathcal{L}_1^{k,i}(\mathcal{X}) \quad (11)$$

where  $\mathcal{L}_1^{k,i}$ , the likelihood function for the  $i$ th replicate of the  $k$ th condition, has the form of Eq. 4 with parameters indexed by condition ( $a_{k,i}, b_{k,i}, r_{k,i}^a, r_{k,i}^b, \omega_k$ ). The log-likelihood function for  $H_1$  is thus

$$\ln \mathcal{L}_1(\mathcal{X}) = \sum_{k=1}^2 \sum_{i=1}^n \ln \mathcal{L}_1^{k,i}(\mathcal{X}) \quad (12)$$

where

$$\begin{aligned} \ln \mathcal{L}_1^{k,i}(\mathcal{X}) &= \gamma(r_{k,i} + a_{k,i}) + \ln(a_{k,i}!) \\ &+ \gamma(r_{k,i} + b_{k,i}) + \ln(b_{k,i}!) \\ &+ 2r_{k,i} \ln r_{k,i} - 2\gamma(r_{k,i}) \\ &+ a_{k,i} \ln(\lambda \ell^a d_i) + b_{k,i} \ln(\omega_k \lambda \ell^b d_i) \\ &- (a_{k,i} + r_{k,i}) \ln(\lambda \ell^a d_i + r_{k,i}) \\ &- (b_{k,i} + r_{k,i}) \ln(\omega_k \lambda \ell^b d_i + r_{k,i}) \end{aligned} \quad (13)$$

and  $\gamma(\cdot) = \ln \Gamma(\cdot)$ . The log-likelihood function for the null hypothesis ( $\ln \mathcal{L}_0$ ) is given by the above expressions with  $\omega_1 = \omega_2 = \omega$ . The aggregation parameters ( $r_{k,i}$ ) are determined from the data with experimental conditions  $k = 1$  and  $2$  considered separately (cf. Eqs. 17–19).

The log-likelihood function  $\ln \mathcal{L}_1(\mathcal{X})$  used in the analysis of  $\Delta$ HEB is maximized by numerically solving uncoupled systems of the form of Eqs. 7 and 8 for  $(\hat{\lambda}_1, \hat{\omega}_1)$  and  $(\hat{\lambda}_2, \hat{\omega}_2)$ . The log-likelihood function  $\ln \mathcal{L}_0(\mathcal{X})$  is maximized by solving for  $\hat{\lambda}_1, \hat{\lambda}_2$  and  $\hat{\omega}$  that lead to zero partial derivatives,

$$0 = \left. \frac{\partial \ln \mathcal{L}_0}{\partial \lambda_1} \right|_{\hat{\lambda}_1, \hat{\lambda}_2, \hat{\omega}} \quad (14)$$

$$0 = \left. \frac{\partial \ln \mathcal{L}_0}{\partial \lambda_2} \right|_{\hat{\lambda}_1, \hat{\lambda}_2, \hat{\omega}} \quad (15)$$

$$0 = \left. \frac{\partial \ln \mathcal{L}_0}{\partial \omega} \right|_{\hat{\lambda}_1, \hat{\lambda}_2, \hat{\omega}}. \quad (16)$$

The optimal parameter values are used to evaluate the likelihoods,  $\hat{\mathcal{L}}_0(\mathcal{X}; \hat{\lambda}_1, \hat{\lambda}_2, \hat{\omega})$  and  $\hat{\mathcal{L}}_1(\mathcal{X}; \hat{\lambda}_1, \hat{\lambda}_2, \hat{\omega}_1, \hat{\omega}_2)$ , and the test statistic  $W$  (see Eq. 1).

The numerical solution of these equations was facilitated by transforming these equations in a manner that ensured both parameters are positive and symmetric with respect to the mean expression levels of homeolog  $A$  and  $B$  (see Appendix 2).

## Results

The likelihood ratio test for HEB applied to allotetraploid *Mimulus luteus*

To demonstrate the application of the likelihood ratio test for HEB, five biological replicates of RNA-seq data

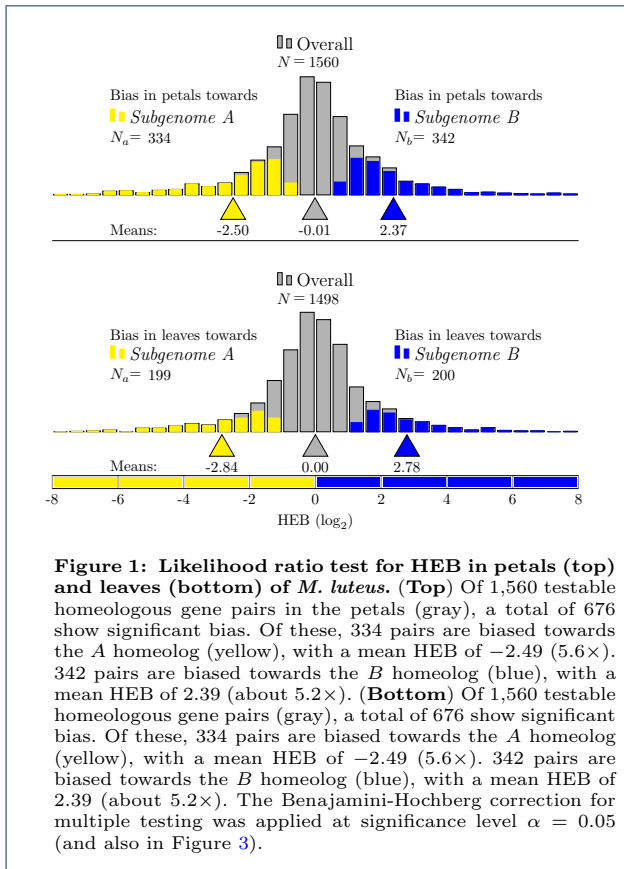

were generated from petals of the tetraploid *Mimulus luteus* (monkeyflower), and another five replicates were generated from the leaves (see Appendix 3 for details). We have chosen *M. luteus* because it is a tetraploid with two distinct subgenomes [37], denoted *A* and *B*. In this section, we use the likelihood ratio test for HEB to find homeologous gene pairs where one homeolog is expressed at significantly different levels than the other, one tissue at a time. In the section on  $\Delta$ HEB we develop a likelihood ratio test to determine whether there is a significant difference in the bias between the two tissues.

#### Homeolog expression bias in *Mimulus luteus* petals

Figure 1 (top panel) shows the result of applying the likelihood ratio test for HEB to the petal data. There are 1,853 homeologous gene pairs in *M. luteus* that can be identified as coming from separate subgenomes. Of these 1,853 homeologous pairs, 1,560 were testable (measurable expression from each individual homeolog). Of the testable pairs, a total of 676 gene pairs show significant bias (using a significance level of  $\alpha = 0.05$ , and applying the Benjamini-Hochberg correction [38, 39] to account for multiple testing error). In the 334 pairs biased towards the *A*

homeolog the mean HEB is  $-2.49$  ( $5.6$ -fold change). In the 342 pairs biased towards the *B* homeolog, the mean HEB is  $2.39$  ( $5.2$ -fold change).

These results may be indicative of a number of evolutionary processes. For example, one of the homeologs may have become sub- or neofunctionalized in this tissue, or one of the homeologs may simply be losing its function.

#### Homeolog expression bias in *Mimulus luteus* leaves

Next, the likelihood ratio test for HEB was applied to the leaf data (results shown in Fig 1, bottom panel). Of the 1,853 homeologous pairs, 1,498 were testable. Of this subset, a total of 399 gene pairs show significant bias. In the 199 pairs biased towards the *A* homeolog the mean HEB is  $-2.83$  ( $7.1$ -fold change). In the 200 pairs biased towards the *B* homeolog, the mean HEB is  $2.80$  ( $7.0$ -fold change).

#### The likelihood ratio test for $\Delta$ HEB applied to allotetraploid *Mimulus luteus*

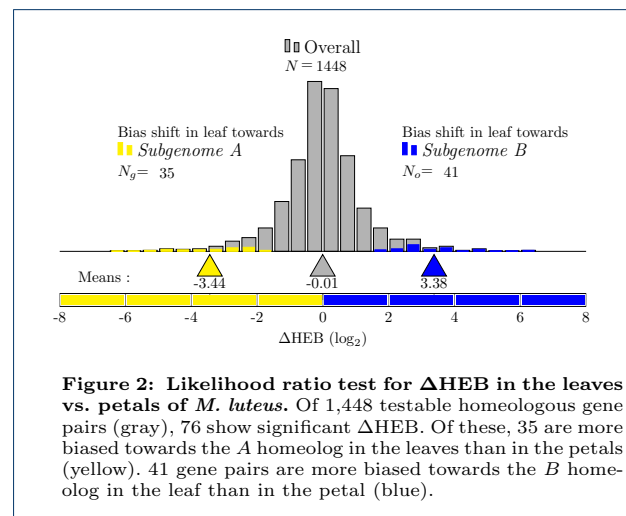

The likelihood ratio test for  $\Delta$ HEB requires each homeolog to have at least one read in each condition. Returning to the leaf and petal data from the previous sections on HEB, this gives 1,448 testable pairs. Figure 2 shows the results of the likelihood ratio test for  $\Delta$ HEB. We find a total of 76 gene pairs show significant  $\Delta$ HEB. Of these, 35 are more biased towards the *A* homeolog in the leaf than they are in the petal. The remaining 41 gene pairs are more biased towards the *B* homeolog in the leaf than they are in the petal.

Figure 3 shows a scatter plot of homeolog expression bias (HEB) in leaf and petal. Colored marks indicate gene pairs with statistically significant changes in homeolog expression bias ( $\Delta$ HEB) (these points correspond to the colored bars in Figure 2). Data points

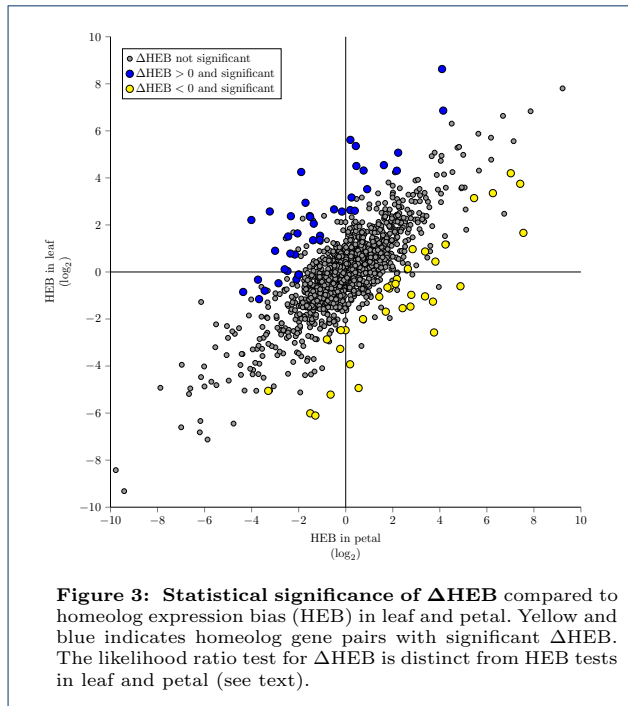

in the top-left and bottom-right quadrants of Figure 3 represent homeologous pairs where one homeolog is more highly expressed in one tissue and its partner is more highly expressed in the other tissue. On the other hand, the top-right and bottom-left quadrants correspond to homeologous pairs where the difference in bias favors the same homeolog but has become more extreme. Finally, all of the marks that are colored blue or yellow show significant change in bias and are candidates for tissue specific sub- or neofunctionalization.

Although the change in homeolog expression bias is defined by Eq. 10 as the log-fold change in homeolog expression bias, the intercalation of significant (yellow and blue) and not significant (gray)  $\Delta$ HEB in Figure 3 makes it clear that statistical evidence for  $\Delta$ HEB is not reducible to the difference between  $HEB_{\text{leaf}}$  and  $HEB_{\text{petal}}$  (the vertical or horizontal distance to the line of slope 1 where  $HEB_{\text{leaf}} = HEB_{\text{petal}}$ ).

Whether or not  $\Delta$ HEB can be called significant also depends on differences in sequencing depths, mean expression levels (e.g., lowly expressed genes are more likely to be influenced by shot noise), and ratios of gene lengths. All of these factors are considered simultaneously in the likelihood ratio test presented here. Calling  $\Delta$ HEB based on sequential HEB results would almost certainly result in a different set of genes being called significant.

#### Validation of the likelihood ratio tests using simulated data

A natural question to ask about HEB and  $\Delta$ HEB is, “How large does the change in expression levels between homeologs across conditions need to be before we can detect  $\Delta$ HEB most of the time?”. Unsurprisingly, this depends largely on the number of biological replicates.

To explore this question we generated simulated data with one expression level fixed at a constant value,  $\mu^a = 100$ , and varied the other expression level,  $\mu^b = 2^x \mu^a$ , with  $x \in [0, 2]$  in steps of 0.1. For each value of  $x$ , we generated 10,000 sets of data from a negative binomial distribution for  $N = 3, 6, 12$  and 24 replicates. We fixed the parameter  $r = 10$  for simplicity; this is in the typical range of values we have observed in RNA-seq data.

Fig 4 shows the results of the likelihood ratio test for HEB on this simulated data set. We find that a 4-fold change is almost always detectable, regardless of the number of replicates. However, detecting a 2-fold change at least 95% of the time requires at least 12 replicates.

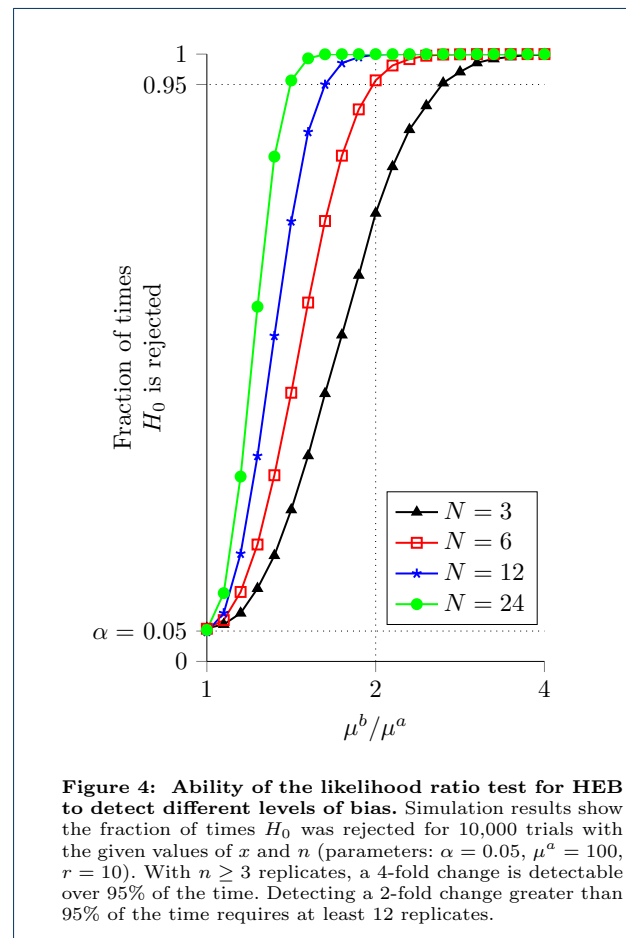

To assess the sensitivity of  $\Delta$ HEB to different levels of bias shift, we created a similar data set. This time, we set 3 of the expression levels equal ( $\mu_1^a = \mu_1^b = \mu_2^a = 100$ ), and varied the fourth;  $\mu_2^b = 2^x \mu_2^a$ , with  $x \in [0, 2]$  in steps of 0.1. The aggregation parameter was again fixed at  $r = 10$ . For each value of  $x$ , 10,000 sets of data were generated from a negative binomial distribution for  $N = 3, 6, 12$  and 24 replicates.

Fig 5 shows the results of the likelihood ratio test for  $\Delta$ HEB on this simulated data set. The results are similar to those for HEB, with the test for  $\Delta$ HEB being slightly less sensitive than the test for HEB. For  $\Delta$ HEB, a 4-fold change in bias is detected more than 95% of the time when  $N \geq 6$ . As with the test for HEB, the ability to detect smaller changes increases significantly with the number of replicates.

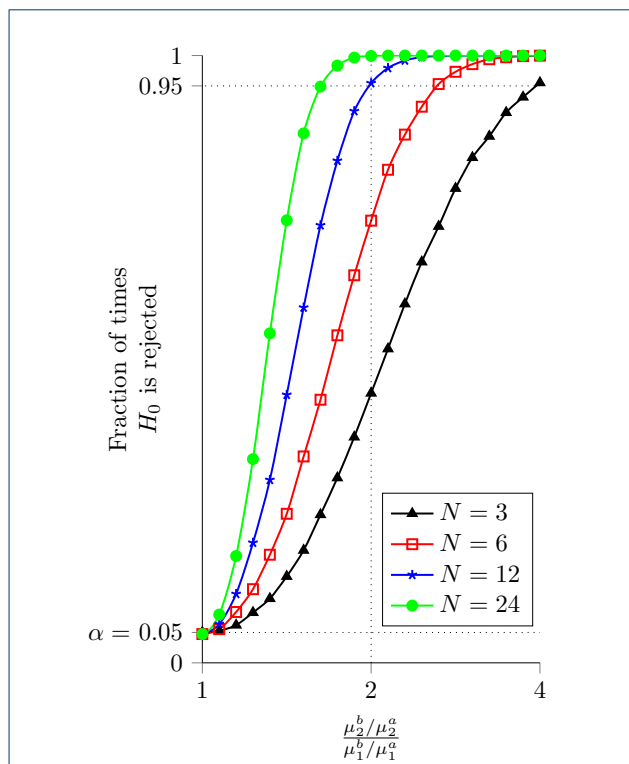

**Figure 5: Ability of the likelihood ratio test for  $\Delta$ HEB to detect different levels of change in bias.** Simulation results show the fraction of times  $H_0$  was rejected for 10,000 trials with given values of  $x$  and  $n$  (parameters:  $\alpha = 0.05$ ,  $\mu_1^a = \mu_1^b = \mu_2^a = 100$ ,  $r = 10$ ). With  $n \geq 6$  replicates, a 4-fold change is detectable over 95% of the time. However, detecting a 2-fold change more than 95% of the time requires at least 24 replicates.

## Discussion

### Alternative Methods

While our method is transparent, derived specifically for the analysis of  $\Delta$ HEB, and requires a minimal

number of assumptions, we also wished to investigate whether other methods could achieve similar results. Since we found nothing directly comparable to our method in the literature, we developed three additional ad hoc methods. To compare these methods we generated simulated data sets and analyzed ROC curves. Each data set contained 20,000 gene pairs, half of which had  $\Delta$ HEB fixed at a constant value (2, 8, and 16). Three replicates were generated from negative binomial distributions, and this was repeated 100 times for each value of  $\Delta$ HEB (300 simulations total).

First, we took a naive approach and performed t-tests and z-tests on the ratio of  $\log_2$ -fold changes between conditions 1 and 2. Next, we ran DESeq2 and extracted the estimated shrunken  $\log_2$ -fold changes and their standard errors, and performed a z-test (we call this method ‘DEZ’). Unsurprisingly, the naive methods underperformed the LRT, with area under the ROC curve (ROC area) typically less than the LRT by  $\approx 0.05$  to 0.36.

The LRT outperformed DEZ for  $\Delta$ HEB = 8 and 16 (Figure 6, top region). For  $\Delta$ HEB = 2, both methods performed poorly with mean ROC area = 0.5616 for the LRT, while DEZ came out slightly ahead with mean ROC area = 0.5620 (not shown).

It is possible for a test to have a larger ROC area but not necessarily be the best choice, for example, if a curve accumulates a small amount of area for low FPR, and a large amount of area for high FPR. To address this we evaluated partial ROC area for false positive rates between 0 and 0.1 (we assume that, in practice, most researchers would never accept  $FPR > 0.1$ ). By this metric, the LRT outperforms DEZ for  $\Delta$ HEB = 8 and 16, while for  $\Delta$ HEB = 2 both methods performed poorly, with DEZ marginally better (Figure 6, bottom region).

## Conclusion

Gene duplication and polyploidy are extremely important factors in generating the diversity of life on earth. As Ohno stated in his seminal work on gene duplication [1], “Natural selection merely modified while redundancy created” the raw materials necessary for the diversification of life on earth.

In this paper we have developed a robust statistical framework specifically designed for the comparison of duplicate gene expression patterns. Importantly, this technique is consistent and reproducible. Through analysis of simulated data we have shown that these methods perform well, especially given the typically small sample sizes in most RNA-seq experiments. We have shown that the ability to detect small differences in expression levels increases as a function of sample

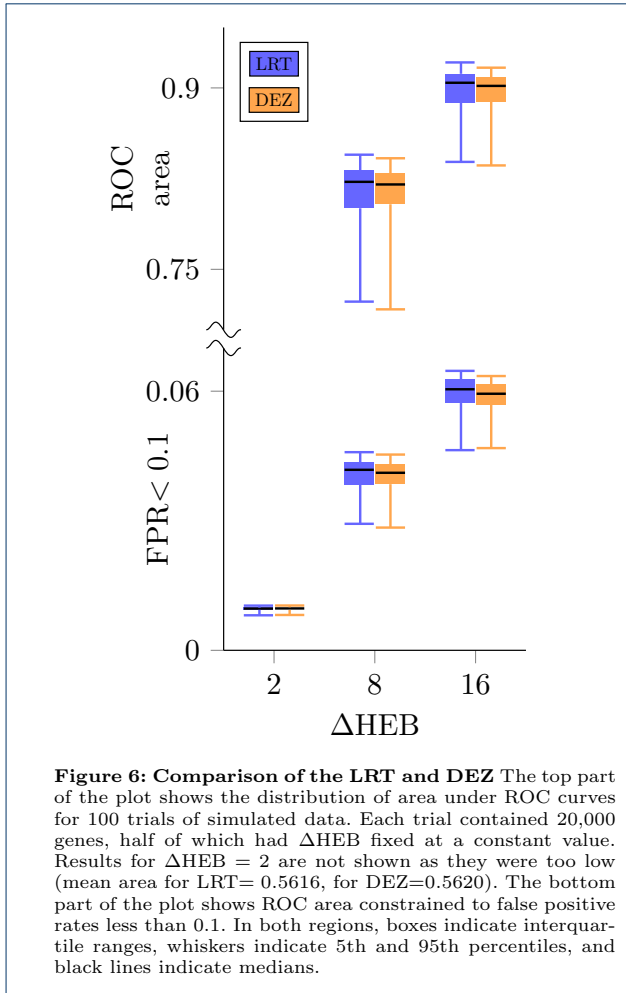

tion of a negative binomial distribution, namely,

$$\sigma^2 = \mu + \frac{1}{r}\mu^2, \quad (17)$$

to compute an aggregation parameter  $r$  for each experimental replicate, after rescaling to account for each replicates sequencing depth.

In brief, let  $x_j^i$  denote the count data for the  $j$ th pair of homeologous genes obtained for experimental replicate  $i \in \{1, 2, \dots, n\}$ . For each of the  $n$  replicates, we produce an auxiliary data set  $(y_{k,j}^i)$  by rescaling the count data for all replicates as though each were obtained in an experiment with the sequencing depth of replicate  $k$ ,

$$y_{k,j}^i = \frac{d_k}{d_i} x_j^i. \quad (18)$$

For each gene ( $j$ ), we compute a scaled mean ( $\mu_{k,j}$ ) and variance ( $\sigma_{k,j}^2$ ) of  $y_{k,j}^i$  over replicates ( $i$ ). To obtain the aggregation parameter  $r_k$ , we perform a non-linear least squares fit of the observed mean-variance relation across all genes. That is,  $r_k$  minimizes the sum of squares error,

$$E = \sum_j \left( \sigma_{k,j}^2 - \mu_{k,j} - \frac{1}{r_k} \mu_{k,j}^2 \right)^2. \quad (19)$$

## Appendix 2: Numerical scheme for maximum likelihood estimation

For the analysis of both HEB and  $\Delta\text{HEB}$ , parameter values maximizing the likelihood functions  $\hat{\mathcal{L}}_0$  and  $\hat{\mathcal{L}}_1$  were obtained using the built-in MATLAB command `fsolve` applied to Eqs. 7–9 and 14–16. In both cases, the numerical procedure was facilitated by changing variables from  $(\lambda, \omega)$  to  $(v, y)$  through

$$\begin{aligned} \lambda &= e^{v-y} \\ \omega &= e^{2y}, \end{aligned}$$

that is,  $v = \ln \lambda + y$  and  $y = (\ln \omega)/2$ . This ensures positivity of  $\lambda$  and  $\omega$  and leads to a system of equations that is symmetric in  $\lambda^a \leftrightarrow \lambda^b$ . The new variable  $v$  is the logarithm of the geometric mean of the expression levels  $\lambda^a = \lambda$  and  $\lambda^b = \omega\lambda$ ,

$$v = \ln \sqrt{\lambda^a \lambda^b} = \ln \sqrt{\lambda \cdot \omega \lambda},$$

that is,  $\lambda^a = \lambda = e^{v-y}$  and  $\lambda^b = \omega\lambda = e^{v+y}$ . The transformed partial derivatives used to maximize the

size, a fact which can be used to aid experimental design. Other authors have noted this with traditional differential expression analysis and made similar recommendations [40–42]. Moreover, we demonstrate the usefulness of the likelihood ratio test for  $\Delta\text{HEB}$  using homeolog expression (RNA-seq) data derived from a polyploid plant. While we have developed this test for the purpose of analyzing changes in expression patterns of homeologous genes, we emphasize that the methods are suitable for the expression analysis of any two genes (they need not be homeologs) across any two conditions.

## Appendix 1: Estimation of aggregation parameters

Due to the typically small number of replicates in RNA-seq experiments, accurate estimation of the aggregation parameter is not realistic on a gene-by-gene basis [34, 43]. Instead, we use the mean-variance rela-



log-likelihood  $\ln \mathcal{L}_1$  (Eqs. 7–8) are

$$0 = \frac{\partial \ln \mathcal{L}_1}{\partial v} = \sum_i B_i(v, y) + A_i(v, y) \quad (20)$$

$$0 = \frac{\partial \ln \mathcal{L}_1}{\partial y} = \sum_i B_i(v, y) - A_i(v, y) \quad (21)$$

where

$$A_i(v, y) = a_i - \frac{(a_i + r_i)e^{v-y}\ell^a d_i}{e^{v-y}\ell^a d_i + r_i} \quad (22)$$

$$B_i(v, y) = b_i - \frac{(b_i + r_i)e^{v+y}\ell^b d_i}{e^{v+y}\ell^b d_i + r_i}. \quad (23)$$

The transformed partial derivative used to maximize  $\ln \mathcal{L}_0$  are found by substituting  $y = 0$  in Eq. 20,

$$0 = \frac{\partial \ln \mathcal{L}_0}{\partial v} = \sum_i B_i(v, 0) + A_i(v, 0).$$

For the analysis of  $\Delta$ HEB, the partial derivatives used to maximize  $\ln \mathcal{L}_1$  are two uncoupled systems of the form of Eq. 20–23, one for each experimental condition ( $k = 1$  and  $2$ ),

$$0 = \frac{\partial \ln \mathcal{L}_1}{\partial v_k} = \sum_i B_{k,i}(v_k, y_k) + A_{k,i}(v_k, y_k)$$

$$0 = \frac{\partial \ln \mathcal{L}_1}{\partial y_k} = \sum_i B_{k,i}(v_k, y_k) - A_{k,i}(v_k, y_k)$$

where

$$A_{k,i}(v, y) = a_{k,i} - \frac{(a_{k,i} + r_{k,i})e^{v-y}\ell^a d_i}{e^{v-y}\ell^a d_i + r_{k,i}}$$

$$B_{k,i}(v, y) = b_{k,i} - \frac{(b_{k,i} + r_{k,i})e^{v+y}\ell^b d_i}{e^{v+y}\ell^b d_i + r_{k,i}}.$$

For the null hypothesis  $y_2 = y_1 = y$  we numerically solve a system of three equations, including

$$0 = \frac{\partial \ln \mathcal{L}_0}{\partial v_k} = \sum_i B_{k,i}(v_k, y) + A_{k,i}(v_k, y)$$

for  $k = 1$  and  $2$ . These are coupled via

$$0 = \frac{\partial \ln \mathcal{L}_0}{\partial y} = \sum_k \sum_i B_{k,i}(v_k, y) - A_{k,i}(v_k, y).$$

### Appendix 3: Experimental methods

Plant tissues were collected from second generation inbred *Mimulus luteus*. All plants were grown in a greenhouse under a 16 hour light regiment at 21°C

and 30% humidity. Petal tissue was collected from the corolla of a flower bud near blooming, and leaf tissue came from young leaves adjacent to the stem apical meristem. Five replicates of each tissue type were collected, at the same time of day, from different individuals. Approximately 100–200 mg of plant tissue was immediately placed into liquid nitrogen. RNA was extracted by grinding frozen tissue with pestles in PureLink® Plant RNA Reagent from Ambion™. Column isolation of RNA was subsequently performed using Direct-zol™ RNA MiniPrep Plus Kit from Zymo Research. Libraries were constructed using KAPA Stranded mRNA-Seq Kit. During library construction, sequence specific Illumina TruSeq® adapters were added to distinguish each library. Using an Agilent 2100 Bioanalyzer, average fragment lengths were determined to be between 230 and 300 bp. Libraries were then pooled and sequenced by the Duke Center for Genomic and Computational Biology on an Illumina HiSeq 2500 instrument. The resulting reads (50 base pair, single end) were mapped to the *M. luteus* genome using bowtie2 [44] with the `--very-sensitive-local` option. Reads to exonic regions were counted using htseq-count [45] with the default settings (minimum alignment quality of 10 on the phred scale).

#### Availability of data and materials

Sample MATLAB code and the data used in  $\Delta$ HEB analysis can be found on the Mathworks file exchange, submission number 62502: <https://www.mathworks.com/matlabcentral/fileexchange/62502>. Raw sequence reads are available on the NCBI SRA under accession number PRJNA380107: <https://www.ncbi.nlm.nih.gov/bioproject/PRJNA380107>.

#### Competing interests

The authors declare that they have no competing interests.

#### Author's contributions

All four co-authors were involved in conception of the work; data analysis and interpretation; and drafting, critical review and final approval of the article. Data collection (TJK and JRP). Mathematical framework and numerical scheme (RDS and GDSC). TJK supervised by JRP. RDS was jointly supervised by JRP and GDSC.

#### Acknowledgements

The work was supported in part by National Science Foundation Grant DMS 1121606 to GDSC, the Biomathematics Initiative at The College of William & Mary, and a W&M Summer Research grant to JRP.

#### Author details

<sup>1</sup>Department of Applied Science, The College of William & Mary, 23187, Williamsburg, VA, USA. <sup>2</sup>Department of Biology, The College of William & Mary, 23187, Williamsburg, VA, USA.

#### References

- Ohno, S.: Evolution by Gene Duplication. Springer, New York (1970)
- Otto, S.P., Whitton, J.: Polyploid incidence and evolution. *Annu. Rev. Genet.* **34**, 401–437 (2000)
- Wendel, J.F.: Genome evolution in polyploids. *Plant Molecular Biology* **42**, 225–249 (2000)
- Crow, K.D., Wagner, G.P.: What is the role of genome duplication in the evolution of complexity and diversity? *Mol. Biol. Evol.* **23**(5), 887–892 (2006)
- Proulx, S.R.: Multiple routes to subfunctionalization and gene duplicate specialization. *Genetics* **190**, 737–751 (2012)

6. McLysaght, A., Hokamp, K., Wolfe, K.H.: Extensive genomic duplication during early chordate evolution. *Nature genetics* **31**(2), 200–204 (2002)
7. Dehal, P., Boore, J.L.: Two rounds of whole genome duplication in the ancestral vertebrate. *PLoS Biol* **3**(10), 314 (2005)
8. Spring, J.: Genome duplication strikes back. *Nature genetics* **31**(2), 128–130 (2002)
9. Chao, D.-Y., Dilkes, B., Luo, H., Douglas, A., Yakubova, E., Lahner, B., Salt, D.E.: Polyploids exhibit higher potassium uptake and salinity tolerance in *Arabidopsis*. *Science* **341**(6146), 658–659 (2013)
10. Sémon, M., Wolfe, K.H.: Preferential subfunctionalization of slow-evolving genes after allopolyploidization in *Xenopus laevis*. *Proceedings of the National Academy of Sciences* **105**(24), 8333–8338 (2008)
11. Rastogi, S., Liberles, D.A.: Subfunctionalization of duplicated genes as a transition state to neofunctionalization. *BMC Evolutionary Biology* **5**(28) (2005)
12. Taylor, J.S., Raes, J.: Duplication and divergence: The evolution of new genes and old ideas. *Annu. Rev. Genet.* (38), 615–643 (2004)
13. Smet, R.D., de Peer, Y.V.: Redundancy and rewiring of genetic networks following genome-wide duplication events. *Current Opinion in Plant Biology* **15**, 168–176 (2012)
14. Blanc, G., Wolfe, K.H.: Functional divergence of duplicated genes formed by polyploidy during *Arabidopsis* evolution. *The Plant Cell* **16**(7), 1679–1691 (2004)
15. Kassahn, K.S., Dang, V.T., Wilkins, S.J., Perkins, A.C., Ragan, M.A.: Evolution of gene function and regulatory control after whole-genome duplication: Comparative analyses in vertebrates. *Genome Research* **19**(8), 1404–1418 (2009)
16. Huminiacki, L., Wolfe, K.H.: Divergence of spatial gene expression profiles following species-specific gene duplications in human and mouse. *Genome research* **14**(10a), 1870–1879 (2004)
17. Makova, K.D., Li, W.-H.: Divergence in the spatial pattern of gene expression between human duplicate genes. *Genome research* **13**(7), 1638–1645 (2003)
18. Gu, Z., Nicolae, D., Lu, H.H., Li, W.-H.: Rapid divergence in expression between duplicate genes inferred from microarray data. *Trends in genetics* **18**(12), 609–613 (2002)
19. Qiu, Y., Liu, S.-L., Adams, K.L.: Frequent changes in expression profile and accelerated sequence evolution of duplicated imprinted genes in *Arabidopsis*. *Genome biology and evolution* **6**(7), 1830–1842 (2014)
20. Jiao, Y., Wickett, N.J., Ayyampalayam, S., Chanderbali, A.S., Landherr, L., Ralph, P.E., Tomsho, L.P., Hu, Y., Liang, H., Soltis, P.S., *et al.*: Ancestral polyploidy in seed plants and angiosperms. *Nature* **473**(7345), 97–100 (2011)
21. Wood, T.E., Takebayashi, N., Barker, M.S., Mayrose, I., Greenspoon, P.B., Rieseberg, L.H.: The frequency of polyploid speciation in vascular plants. *Proceedings of the national Academy of sciences* **106**(33), 13875–13879 (2009)
22. Renny-Byfield, S., Wendel, J.F.: Doubling down on genomes: Polyploidy and crop plants. *American Journal of Botany* **101**(10), 1711–1725 (2014)
23. Kobel, H.R., Pasquier, L.D.: Genetics of polyploid *Xenopus*. *Trends in Genetics* **2**, 310–315 (1986)
24. Wolfe, K.H.: Yesterday's polyploids and the mystery of diploidization. *Nature Reviews Genetics* **2**, 333–341 (2001)
25. Albertin, W., Marullo, P.: Polyploidy in fungi: evolution after whole-genome duplication. *Proc. R. Soc. B* **279**, 2497–2509 (2012)
26. Gallardo, M.H., González, C.A., Cebrián, I.: Molecular cytogenetics and allotetraploidy in the red vizcacha rat *Tympanoctomys barrerae* (Rodentia, Octodontidae). *Genomics* **88**, 214–221 (2006)
27. Rivera, A.S., Pankey, M.S., Plachetzki, D.C., Villacorta, C., Syme, A.E., Serb, J.M., Omilian, A.R., Oakley, T.H.: Gene duplication and the origins of morphological complexity in pancrustacean eyes, a genomic approach. *BMC evolutionary biology* **10**(1), 123 (2010)
28. Hardison, R.C.: Evolution of hemoglobin and its genes. *Cold Spring Harbor perspectives in medicine* **2**(12), 011627 (2012)
29. Hu, C., Lin, S.-y., Chi, W.-t., Chang, Y.-y.: Recent gene duplication and subfunctionalization produced a mitochondrial GrpE, the nucleotide exchange factor of the Hsp70 complex, specialized in thermotolerance to chronic heat stress in *Arabidopsis*. *Plant physiology* **158**(2), 747–758 (2012)
30. Remnant, E.J., Good, R.T., Schmidt, J.M., Lumb, C., Robin, C., Daborn, P.J., Batterham, P.: Gene duplication in the major insecticide target site, *rdl*, in *Drosophila melanogaster*. *Proceedings of the National Academy of Sciences* **110**(36), 14705–14710 (2013)
31. Wang, Z., Gerstein, M., Snyder, M.: RNA-Seq: a revolutionary tool for transcriptomics. *Nature Reviews Genetics* **10**, 57–63 (2009)
32. Soneson, C., Delorenzi, M.: A comparison of methods for differential expression analysis of RNA-seq data. *BMC Bioinformatics* **14**(91) (2013)
33. Love, M.I., Huber, W., Anders, S.: Moderated estimation of fold change and dispersion for RNA-seq data with DESeq2. *Genome Biology* **15**(550) (2014)
34. Anders, S., Huber, W.: Differential expression analysis for sequence count data. *Genome Biology* **11**(R106) (2010)
35. Grover, C.E., Gallagher, J.P., Szadkowski, E.P., Yoo, M.J., Fligel, L.E., Wendel, J.F.: Homoeolog expression bias and expression level dominance in allopolyploids. *New Phytologist* **196**, 966–971 (2012)
36. Wilks, S.S.: The large sample distribution of the likelihood ratio test for testing composite hypotheses. *Ann. Math Statist.* **9**(1), 60–62 (1938)
37. Edger, P.P., Smith, R.D., McKain, M.R., Cooley, A.M., Vallejo-Marin, M., Yuan, Y., Bewick, A.J., Ji, L., Platts, A.E., Bowman, M.J., *et al.*: Subgenome dominance in an interspecific hybrid, synthetic allopolyploid, and a 140 year old naturally established neo-allopolyploid monkeyflower. *The Plant Cell* **29**(9)
38. Benjamini, Y., Hochberg, Y.: Controlling the false discovery rate: a practical and powerful approach to multiple testing. *Journal of the royal statistical society. Series B (Methodological)*, 289–300 (1995)
39. Grope, D.M.: Benjamini & Hochberg/Yekutieli false discovery rate control procedure for a set of statistical tests (2015). <https://www.mathworks.com/matlabcentral/fileexchange/27418-fdr-bh> Accessed 6 Dec 2017
40. Liu, Y., Zhou, J., White, K.P.: RNA-seq differential expression studies: more sequence or more replication? *Bioinformatics* **30**(3), 301–304 (2013)
41. Schurch, N.J., Schofield, P., Gierlinski, M., Cole, C., Sherstnev, A., Singh, V., Wrobel, N., Gharbi, K., Simpson, G.G., Owen-Hughes, T., Blaxter, M., Barton, G.J.: How many biological replicates are needed in an RNA-seq experiment and which differential expression tool should you use? *RNA* **22**(6), 839–851 (2016)
42. Roulin, A., Auer, P.L., Libault, M., Schlueter, J., Farmer, A., May, G., Stacey, G., Doerge, R.W., Jackson, S.A.: The fate of duplicated genes in a polyploid plant genome. *The Plant Journal* **73**(1), 143–153 (2013)
43. Robinson, M.D., Smyth, G.K.: Small-sample estimation of negative binomial dispersion, with applications to SAGE data. *Biostatistics* **9**(2), 321–332 (2008)
44. Langmead, B., Salzberg, S.L.: Fast gapped-read alignment with Bowtie 2. *Nature methods* **9**(4), 357–359 (2012)
45. Anders, S., Pyl, P.T., Huber, W.: HTSeq—a Python framework to work with high-throughput sequencing data. *Bioinformatics*, 638 (2014)
